# Supplementary material
Source: Royal Society of Chemistry journal article supplement (doi:10.1039/d6nr00661b)
Supplement: d6nr00661b1.pdf [file d6nr00661b1.pdf]

**Polaron Activation in Conjugated Polymers for Enhanced T<sub>2</sub> MRI Contrast**

Yifei Song<sup>1, 2</sup>, Qinrui Lin<sup>1, 3\*</sup> and Zhengzhong Shao<sup>1, 2, 3\*</sup>

<sup>1</sup>State Key Laboratory of Molecular Engineering of Polymers, Fudan University, Shanghai, China.

<sup>2</sup>Department of Macromolecular Science, Fudan University, Shanghai, China.

<sup>3</sup>Laboratory of Advanced Materials, Fudan University, Shanghai, China.

\*e-mail: zzshao@fudan.edu.cn; [qrlin17@fudan.edu.cn](mailto:qrlin17@fudan.edu.cn)

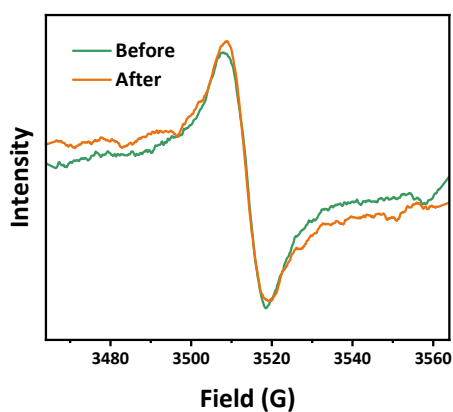

**Fig. s1** ESR spectra of the PPy nanoparticles treated before and after acid treatment.

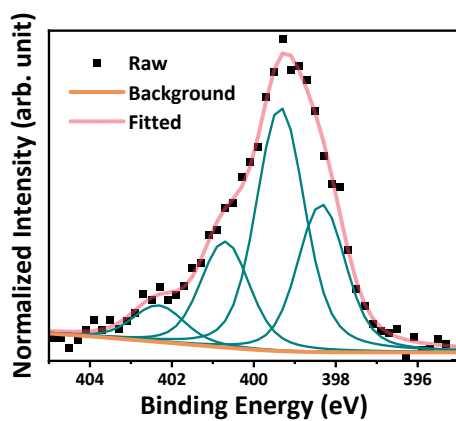

**Fig. s2** Peaking fitting analysis of the N 1s region of the acid treated PPy nanoparticles

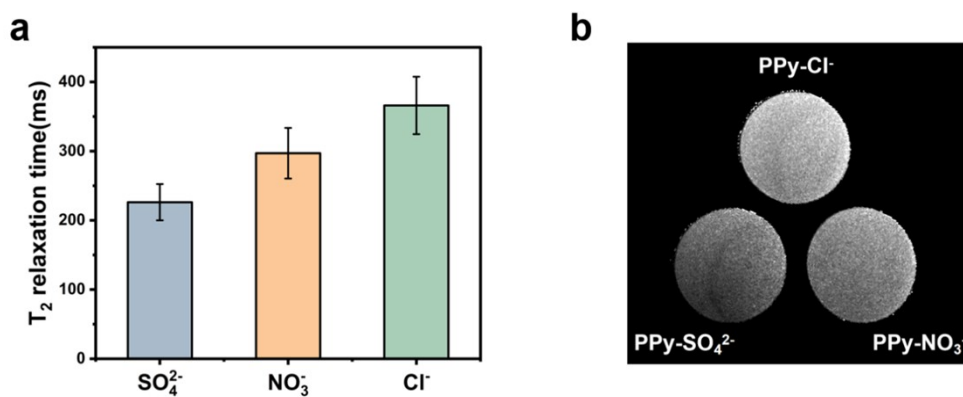

**Fig. s3** (a)  $T_2$  relaxation times and (b)  $T_2$ -weighted imaging data of the PPy nanoparticles prepared with different complexion ions.

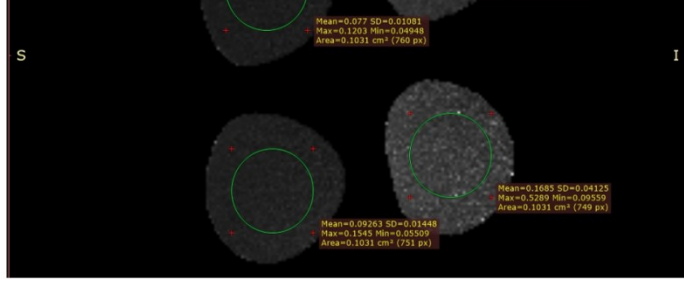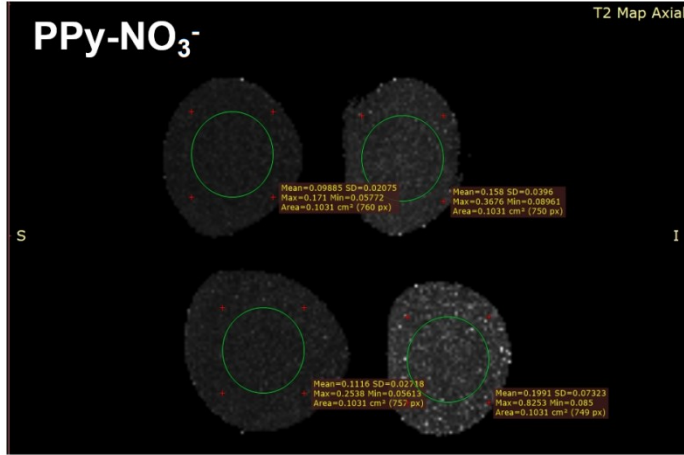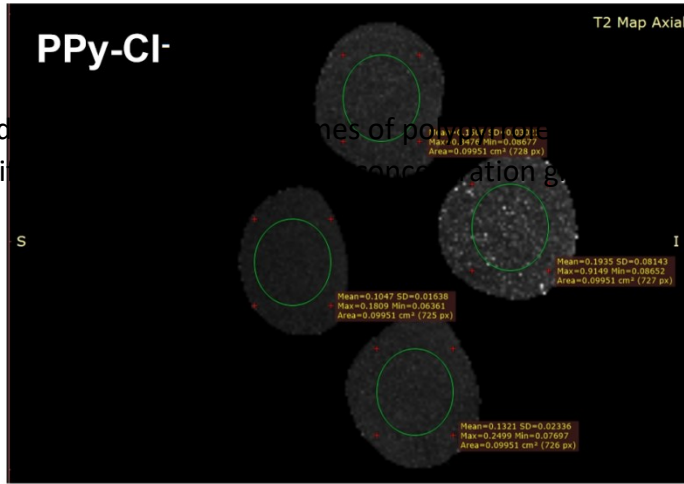

**Fig. s4** T<sub>2</sub>-weighted imaging of PPy nanoparticles prepared with different concentrations of PPy (0.5, 1.0, 1.5, and 2.0).

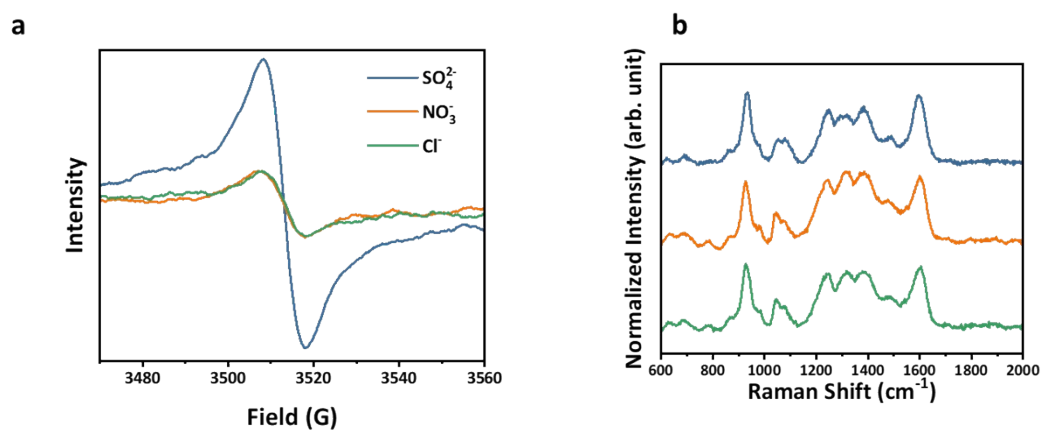

**Fig. s5** (a) ESR spectra and (b) Raman spectra of the PPy nanoparticles prepared with different complex ions.

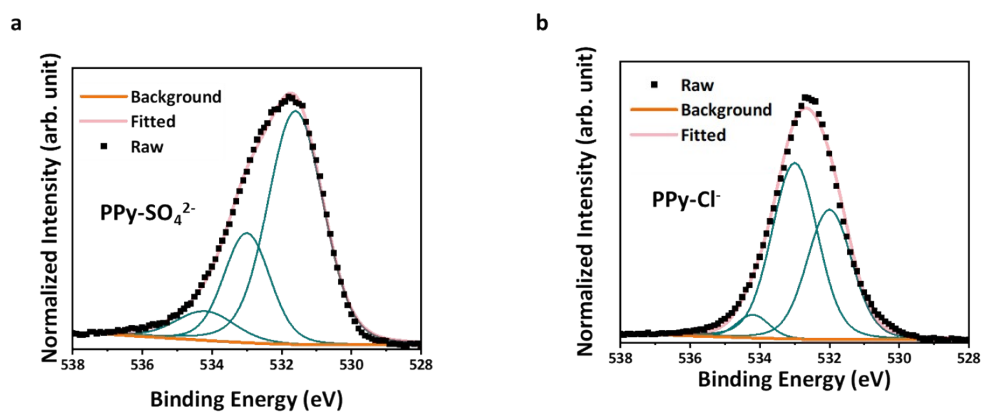

**Fig. s6** Peak fitting analysis of the O 1s region for the PPy nanoparticles with different complex ions.

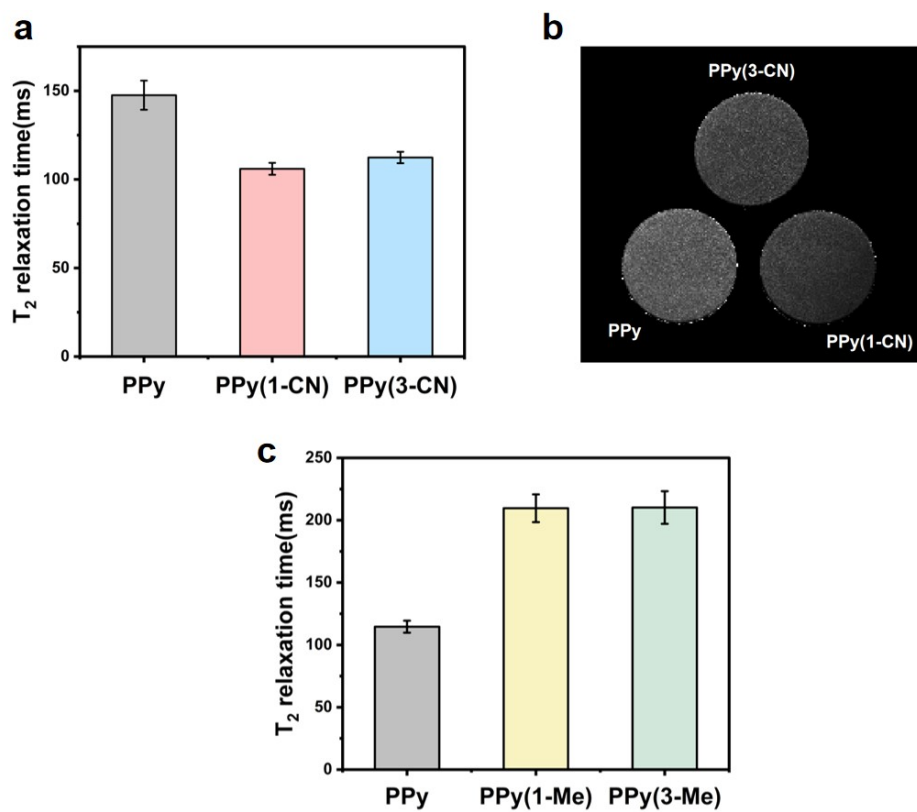

**Fig. s7** (a) T<sub>2</sub> relaxation times and (b) T<sub>2</sub>-weighted imaging data of the cyano-substituted polypyrrole derivative nanoparticles. (c) T<sub>2</sub> relaxation time of the methyl-substituted polypyrrole derivative nanoparticles.

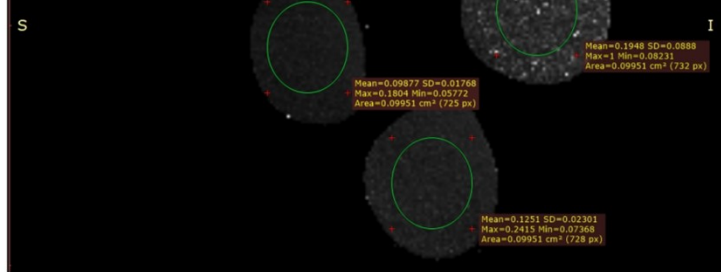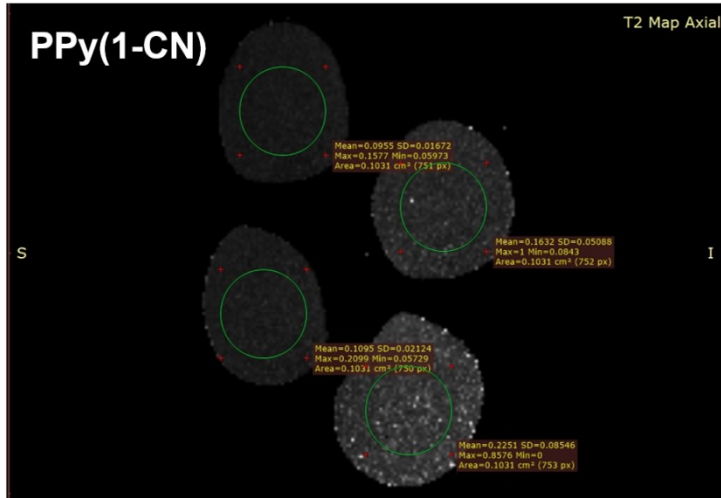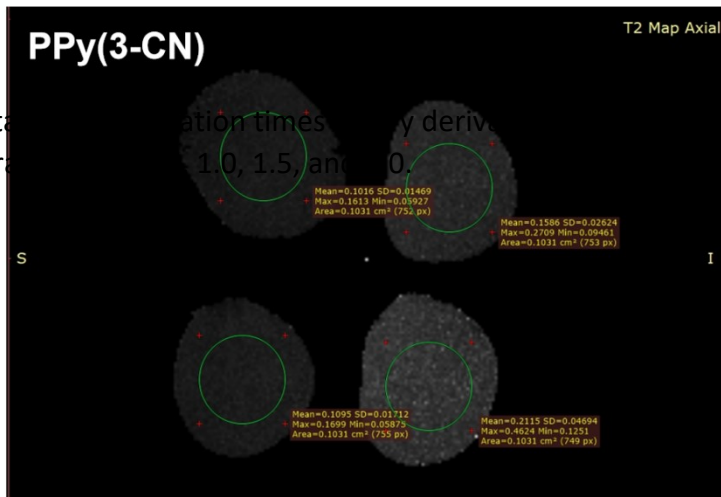

**Fig. s8** T<sub>2</sub>-weighted imaging data for PPy(1-CN) at concentration groups of 1.0, 1.5, and 2.0. The images were processed using ImageJ to derive the statistical data.

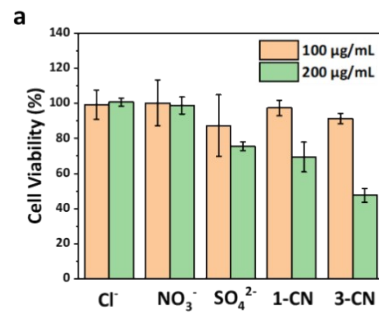

**b**

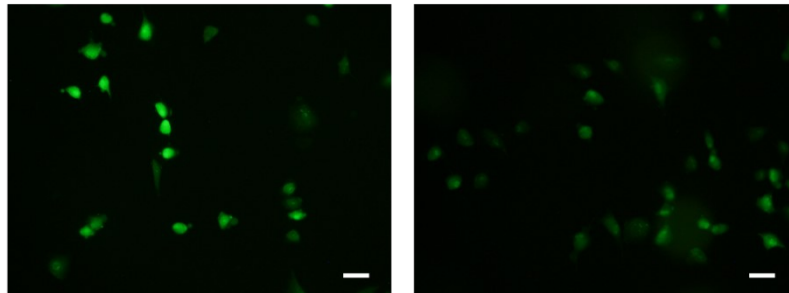

**Fig. s9** (a) Cell viabilities of the L929 cells incubated with the different types of PPy nanoparticles. (b) Fluorescence microscope images of L929 cells treated with PPy(1-CN) nanoparticles at high (left) and low (right) concentrations after staining with DCFH-DA probe (Scale bar = 50 µm).
